# Supplementary material
Source: publisher site journal article supplement (https://www.dovepress.com/article/549263)
Supplement: Supplementary file 1 [file 549263%20Revised%20Supplementary%20Material.docx]

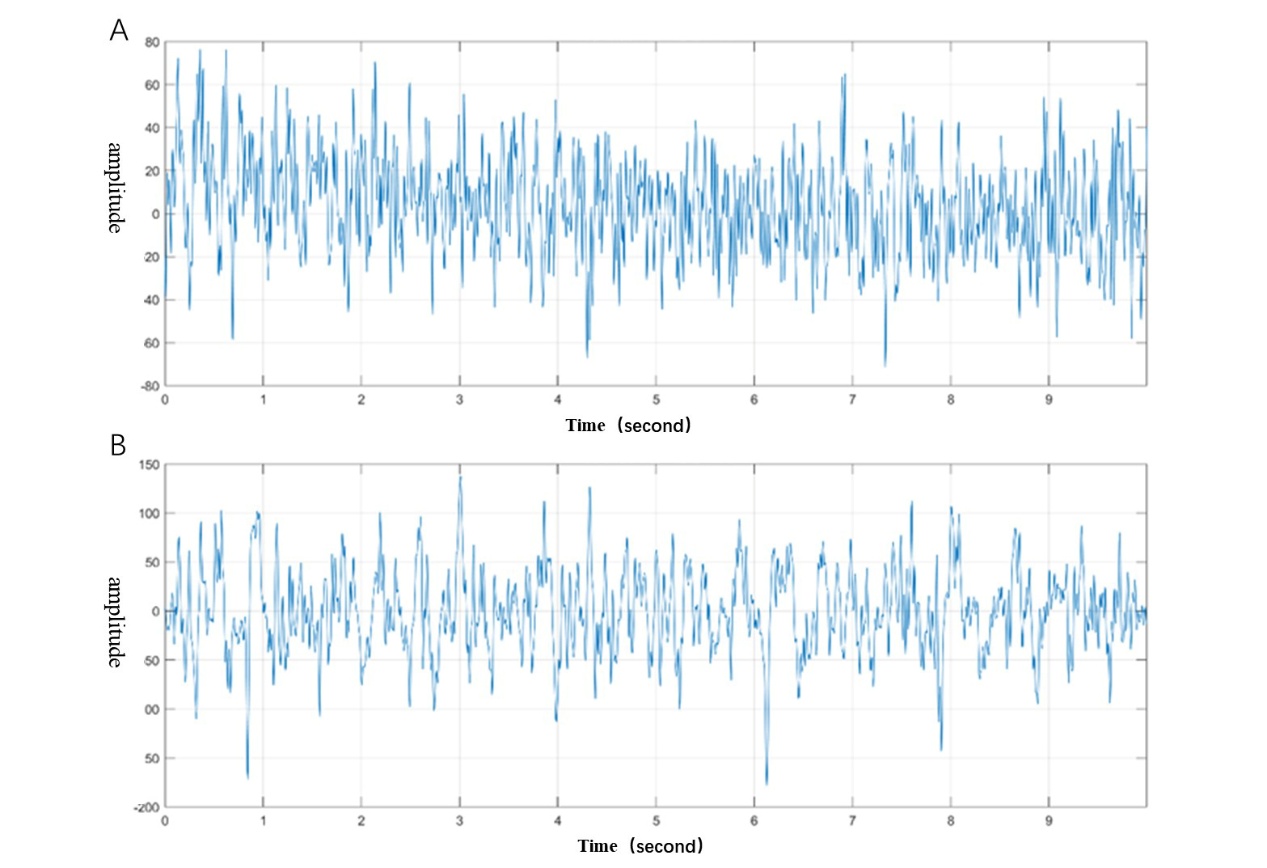


Supplementary Figure S1. Representative 10-second raw EEG traces with scale bars.

(A) Natural Sleep (NS): a 10-second frontal EEG segment during NREM sleep.

(B) Sleep Deprivation (SD): a 10-second frontal EEG segment during NREM sleep from a sleep-deprived mouse, showing the relative absence of spindle oscillations.


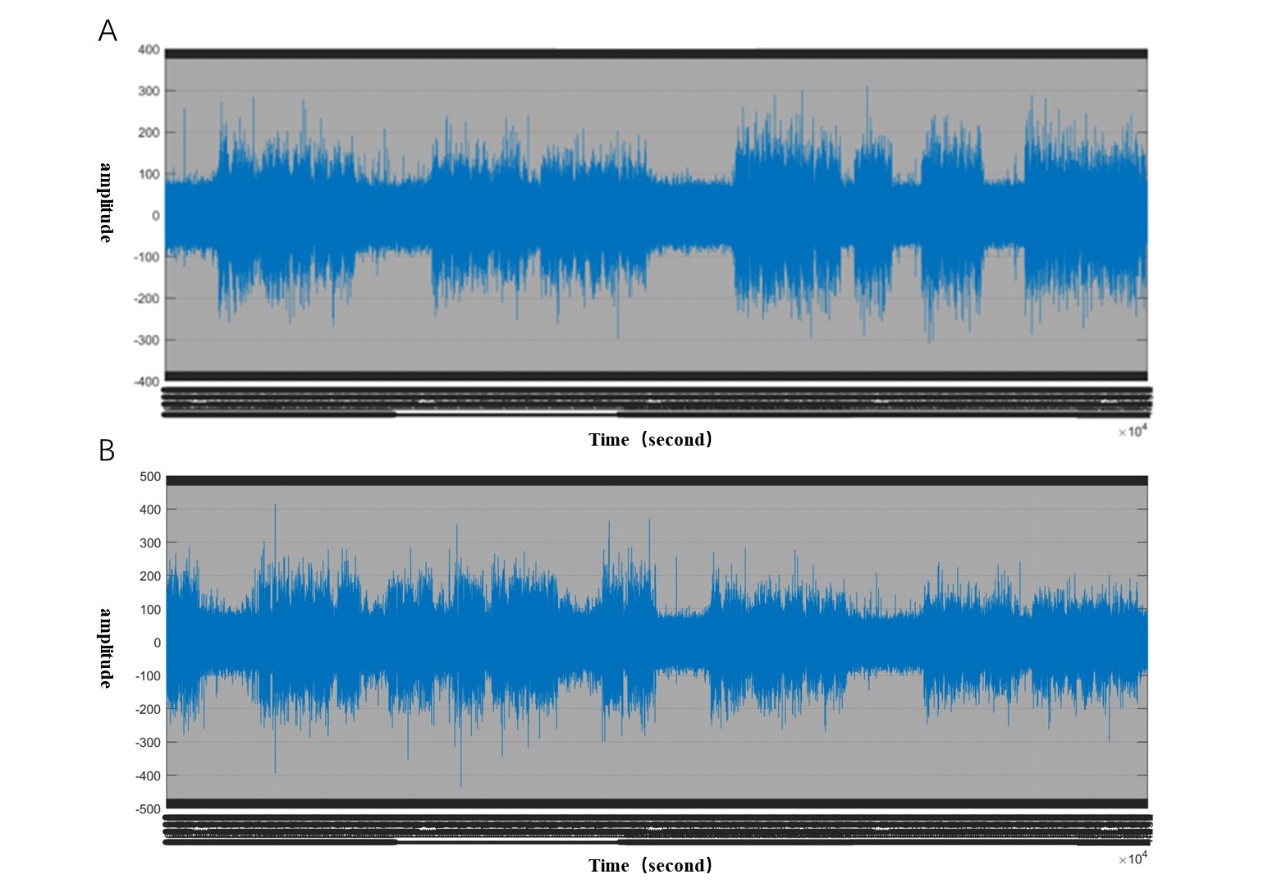


Supplementary Figure S2. Representative full-length EEG recordings for context.

(A) Natural Sleep (NS): a full-length frontal EEG trace during NREM sleep, showing periodic spindle events.

(B) Sleep Deprivation (SD): a full-length frontal EEG trace during NREM sleep from a sleep-deprived mouse, showing reduced or absent spindle oscillations across the recording.
